# Supplementary material for: Acidosis promotes invasiveness of breast cancer cells through ROS-AKT-NF-κB pathway
Source: PubMed Central journal article supplement (PMC4322981; doi:10.18632/oncotarget.2514), 2014-09-25
Supplement: oncotarget-05-12070-s001.pdf [file oncotarget-05-12070-s001.pdf]

# Acidosis promotes invasiveness of breast cancer cells through ROS-AKT-NF- $\kappa$ B pathway

## Supplementary Material

Table S1 Oligonucleotides used for gene cloning in this study

5x NF $\kappa$ B-TK mini

```
CGTGCTAGCCCGGGCTCGAGGGGAATTTCCGGGGACTTTCCGGGAATTTCCGGGGACTTTCCGGGAATTT  
CCGAACACGCAGATGCAGTCGGGGCGGCGCGGTCCGAGGTCCACTTCGCATATTAAGGTGACGCGTGTGG  
CCTCGAACACCGA
```

pGL3-B-Xho1-5.1

```
CGTGCTAGCCCGGGCTCGAG
```

TKmini-Luc-Nco1-3.1

```
TTGGCGTCTTCCATGGTGGCTCGGTGTTTCGAGGCCACACG
```

PTEN-Myc-R1-5.1

```
CCATGGAGGCCCGAATTCTGACAGCCATCATCAAAGAG
```

PTEN-Not1-3.1

```
TCGCAGATCCTTGCGGCCGCTCAGACTTTTGTAAATTTGTG
```

PTEN-C71S-5.1

```
TTACAAGATATACAATCTTAGTGCTGAAAGACATTATGAC
```

PTEN-C71S-3.1

```
GTCATAATGTCTTTCAGCACTAAGATTGTATATCTTGTAA
```

PTEN-C124S-5.1

```
ATCATGTTGCAGCAATTCACAGTAAAGCTGGAAAGGGACG
```

PTEN-C124S-3.1

```
CGTCCCTTTCAGCTTTACTGTGAATTGCTGCAACATGAT
```

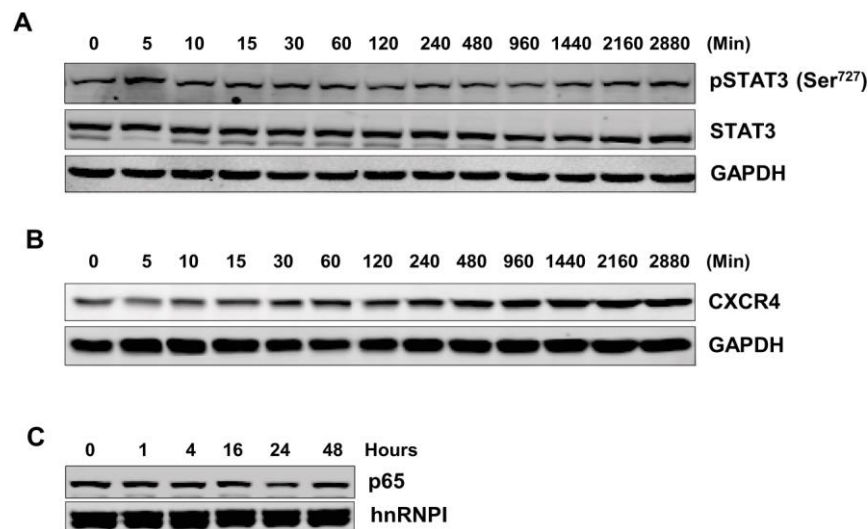

Figure S1: Acidosis does not activate STAT3 but induces CXCR4 in breast cancer cells. (A, B) MCF-7 cells were cultured at pH 6.6 for the indicated times, whole cell extracts were prepared and analyzed for pSTAT3, STAT3 and CXCR4 by Western blotting. GAPDH was used as an internal control. (C) MCF-7 cells were cultured at pH 7.4 for the indicated times, nuclear extracts were prepared and analyzed for NF- $\kappa$ B-p65 by Western blotting.

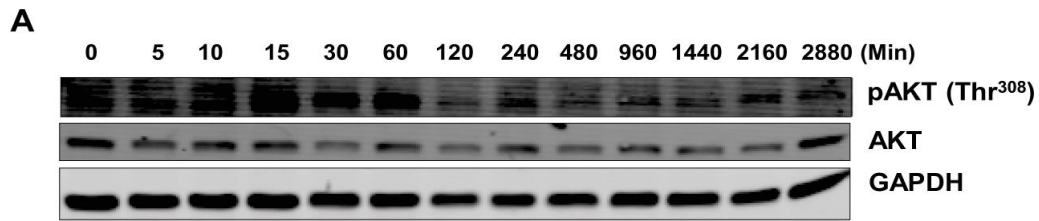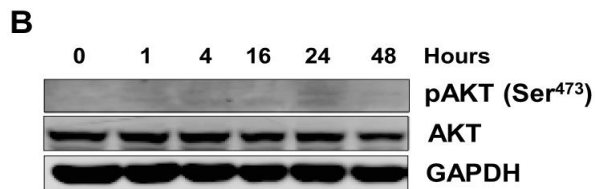

Figure S2: Acidosis induces phosphorylation of AKT at Thr<sup>308</sup>. (A) MCF-7 cells were cultured at pH 6.6 for indicated times, whole cell extract were prepared and analyzed using indicated antibodies by Western blotting. (B) MCF-7 cells were cultured at pH 7.4 for indicated times, whole cell extract were prepared and analyzed using indicated antibodies by Western blotting.

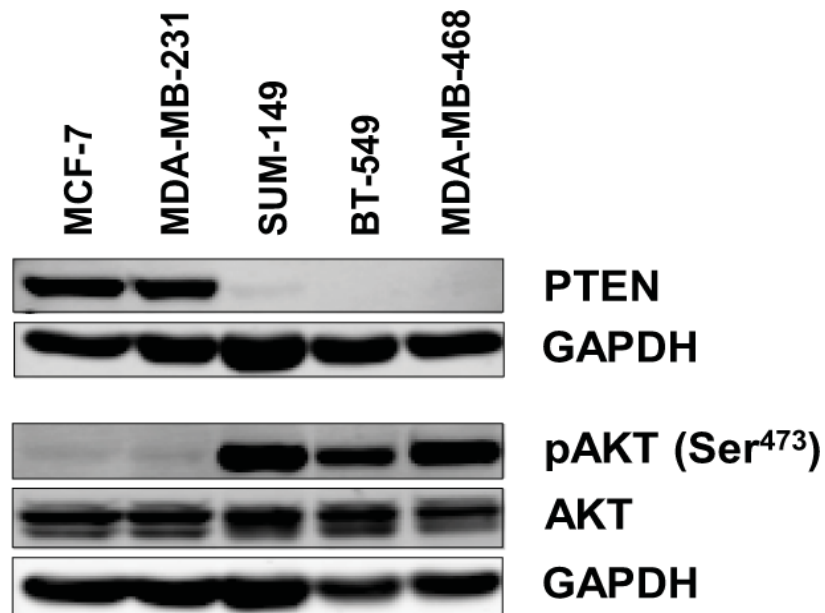

Figure S3: Constitutive activation of AKT in PTEN deficient cells. The whole cell extracts were prepared from indicated cell lines and analyzed for indicated proteins by Western blot analysis.
